# Supplementary material for: ZIP1+ fibroblasts protect lung cancer against chemotherapy via connexin-43 mediated intercellular Zn2+ transfer
Source: PubMed Central journal article supplement (PMC9547061; doi:10.1038/s41467-022-33521-4), 2022-10-07
Supplement: 41467_2022_33521_MOESM1_ESM.pdf [file 41467_2022_33521_MOESM1_ESM.pdf]

# **Supplementary Information**

**ZIP1<sup>+</sup> fibroblasts protect lung cancer against chemotherapy via connexin-43  
mediated intercellular Zn<sup>2+</sup> transfer**

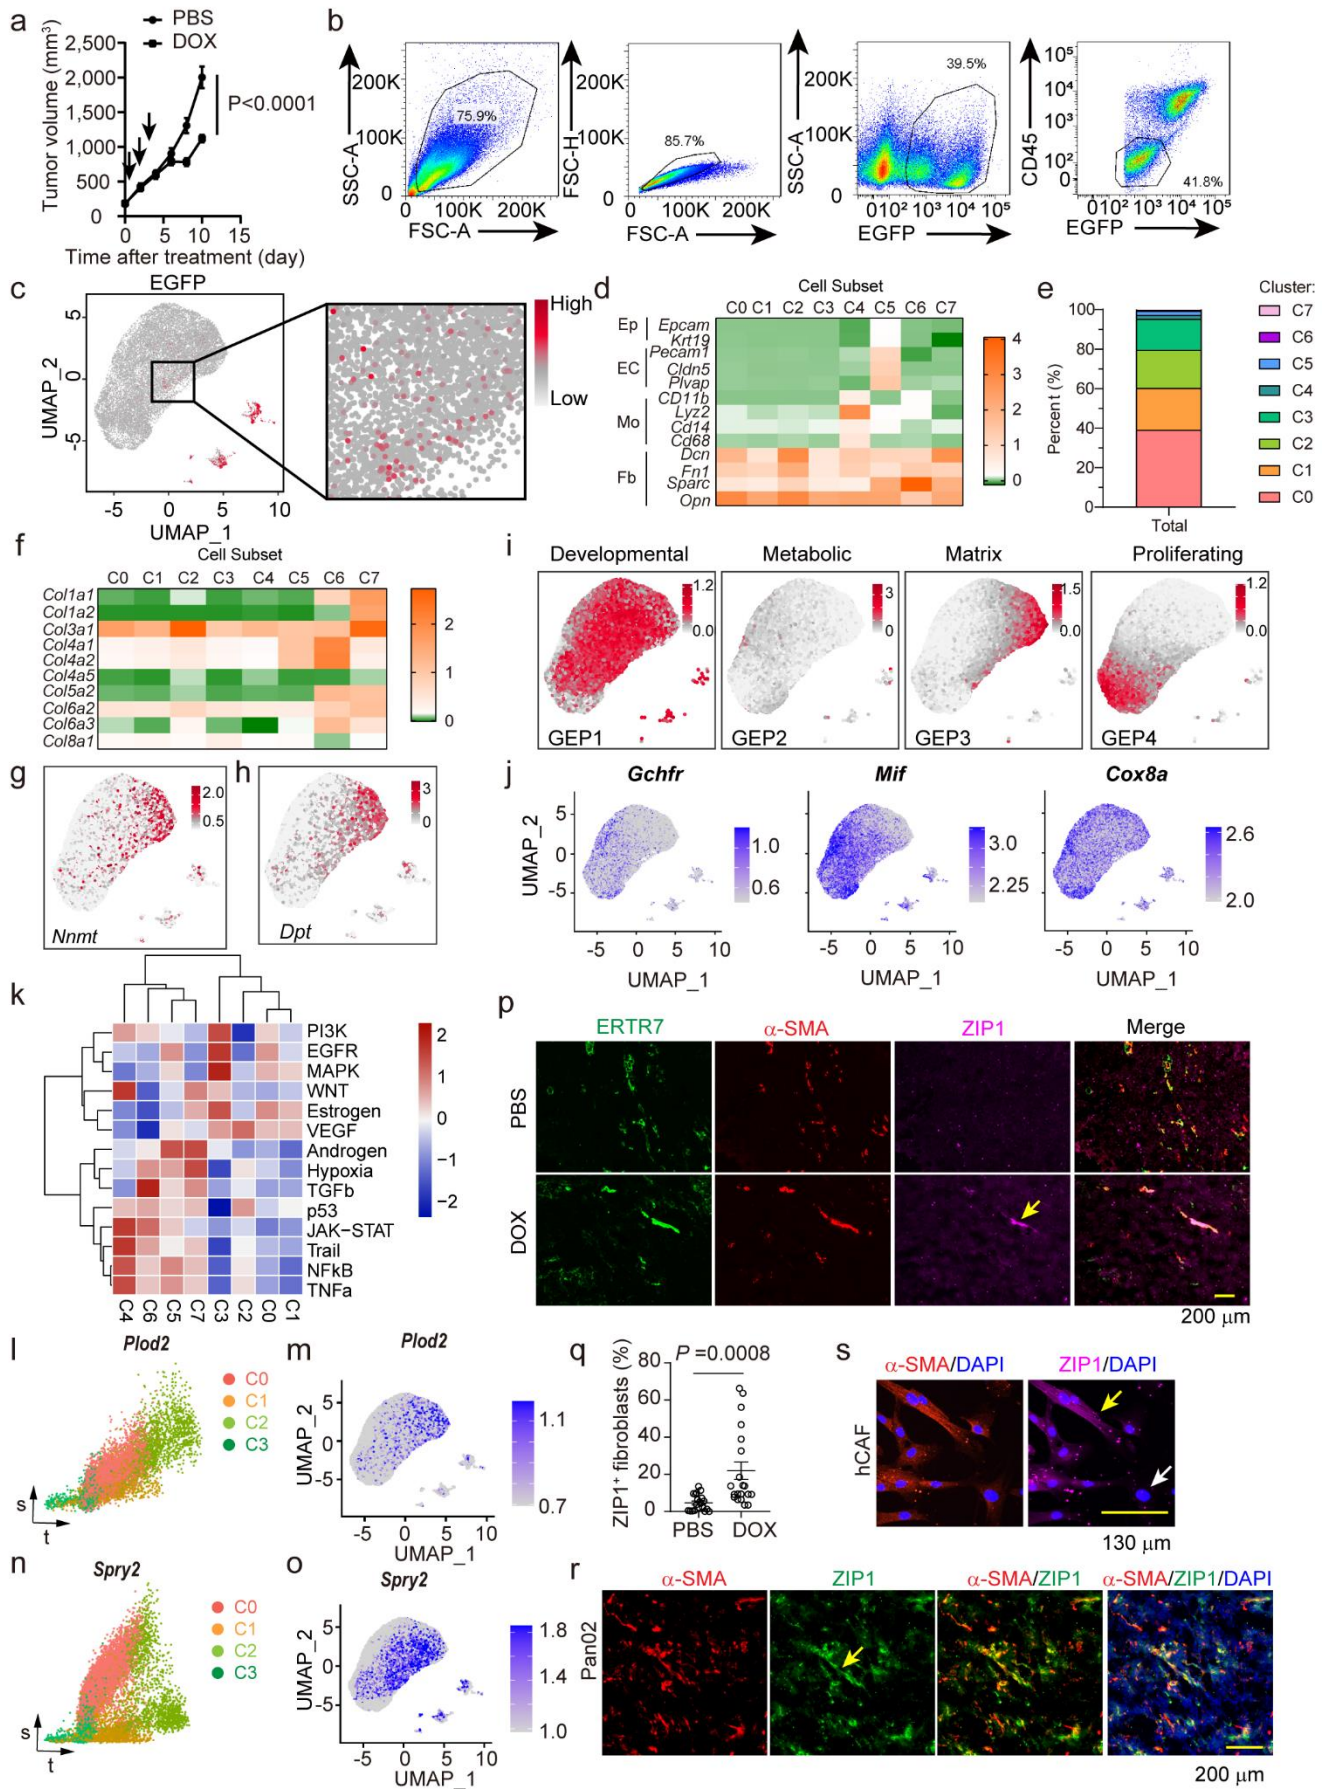

**Supplementary Figure 1. scRNAseq shows that *Zip1*<sup>+</sup> fibroblasts are enriched in LLC tumors after DOX treatment.** (a) Growth curves of LLC tumor implanted into C57BL/6 mice without or with DOX (5 mg/kg) treatment (black arrow, at day 0, 2, 4). PBS, n = 5; DOX, n =6. Two-way ANOVA for tumor growth curve comparison. (b) Sorting strategy of EGFP<sup>+</sup>CD45<sup>-</sup> stromal cells for scRNAseq. (c) UMAP plot showing the expression of EGFP in recovered cells. (d) Heatmap showing cell-specific makers of each subset. Ep, epithelial cell; EC, endothelial cell; Mo, monocyte; Fb, fibroblast. (e) Faceted bar graph showing the cell percentages of cell subsets. (f) Heatmap showing the expression of collagens in cell subsets. (g) UMAP plot showing the expression of *Nnmt* in cell subsets. (h) UMAP plot showing the expression of *Dpt* in cell subsets. (i) UMAP plot showing the activity of gene expression programs 1-4 (GEP1-4) in cell subsets. (j) UMAP plot showing the expression of *Gchfr*, *Mif* and *Cox8a* in cell subsets. (k) Pathway activity as estimated by the PROGENy algorithm. (l) Changes of spliced (s) mRNAs of *Plod2* along with latent time (t) estimated with scVelo. (m) UMAP plot showing the expression of *Plod2* in cell subsets. (n) Changes of spliced (s) mRNAs of *Spry2* along with latent time (t) estimated with scVelo. (o) UMAP plot showing the expression of *Spry2* in cell subsets. (p) LLC tumor sections from mice treated with PBS or DOX were stained for ZIP1 and the fibroblast marker ERTR7/ $\alpha$ -SMA. Arrow, ZIP1<sup>+</sup> fibroblasts. Representative staining results from three tumours for each group are shown. (q) The percentage of ZIP1<sup>+</sup> fibroblasts was determined by comparing ZIP1/ERTR7 co-expression to the ERTR7 signal in LLC tumors. Mann–Whitney test for two-group comparison. Twenty images derived from three tumours for each group were analysed. (r) Pan02 tumor sections were stained for ZIP1 and the fibroblast marker  $\alpha$ -SMA. Arrow, ZIP1<sup>+</sup> fibroblasts. Representative staining results from two independent experiments are shown. (s) Immunostaining of ZIP1 and  $\alpha$ -SMA in human lung adenocarcinoma-associated fibroblasts (hCAF). Yellow arrow, ZIP1<sup>+</sup> fibroblasts; white arrow, ZIP1<sup>-</sup> fibroblasts. Representative staining results from two independent experiments are shown. Source data are provided as a Source Data file (a, e, q).

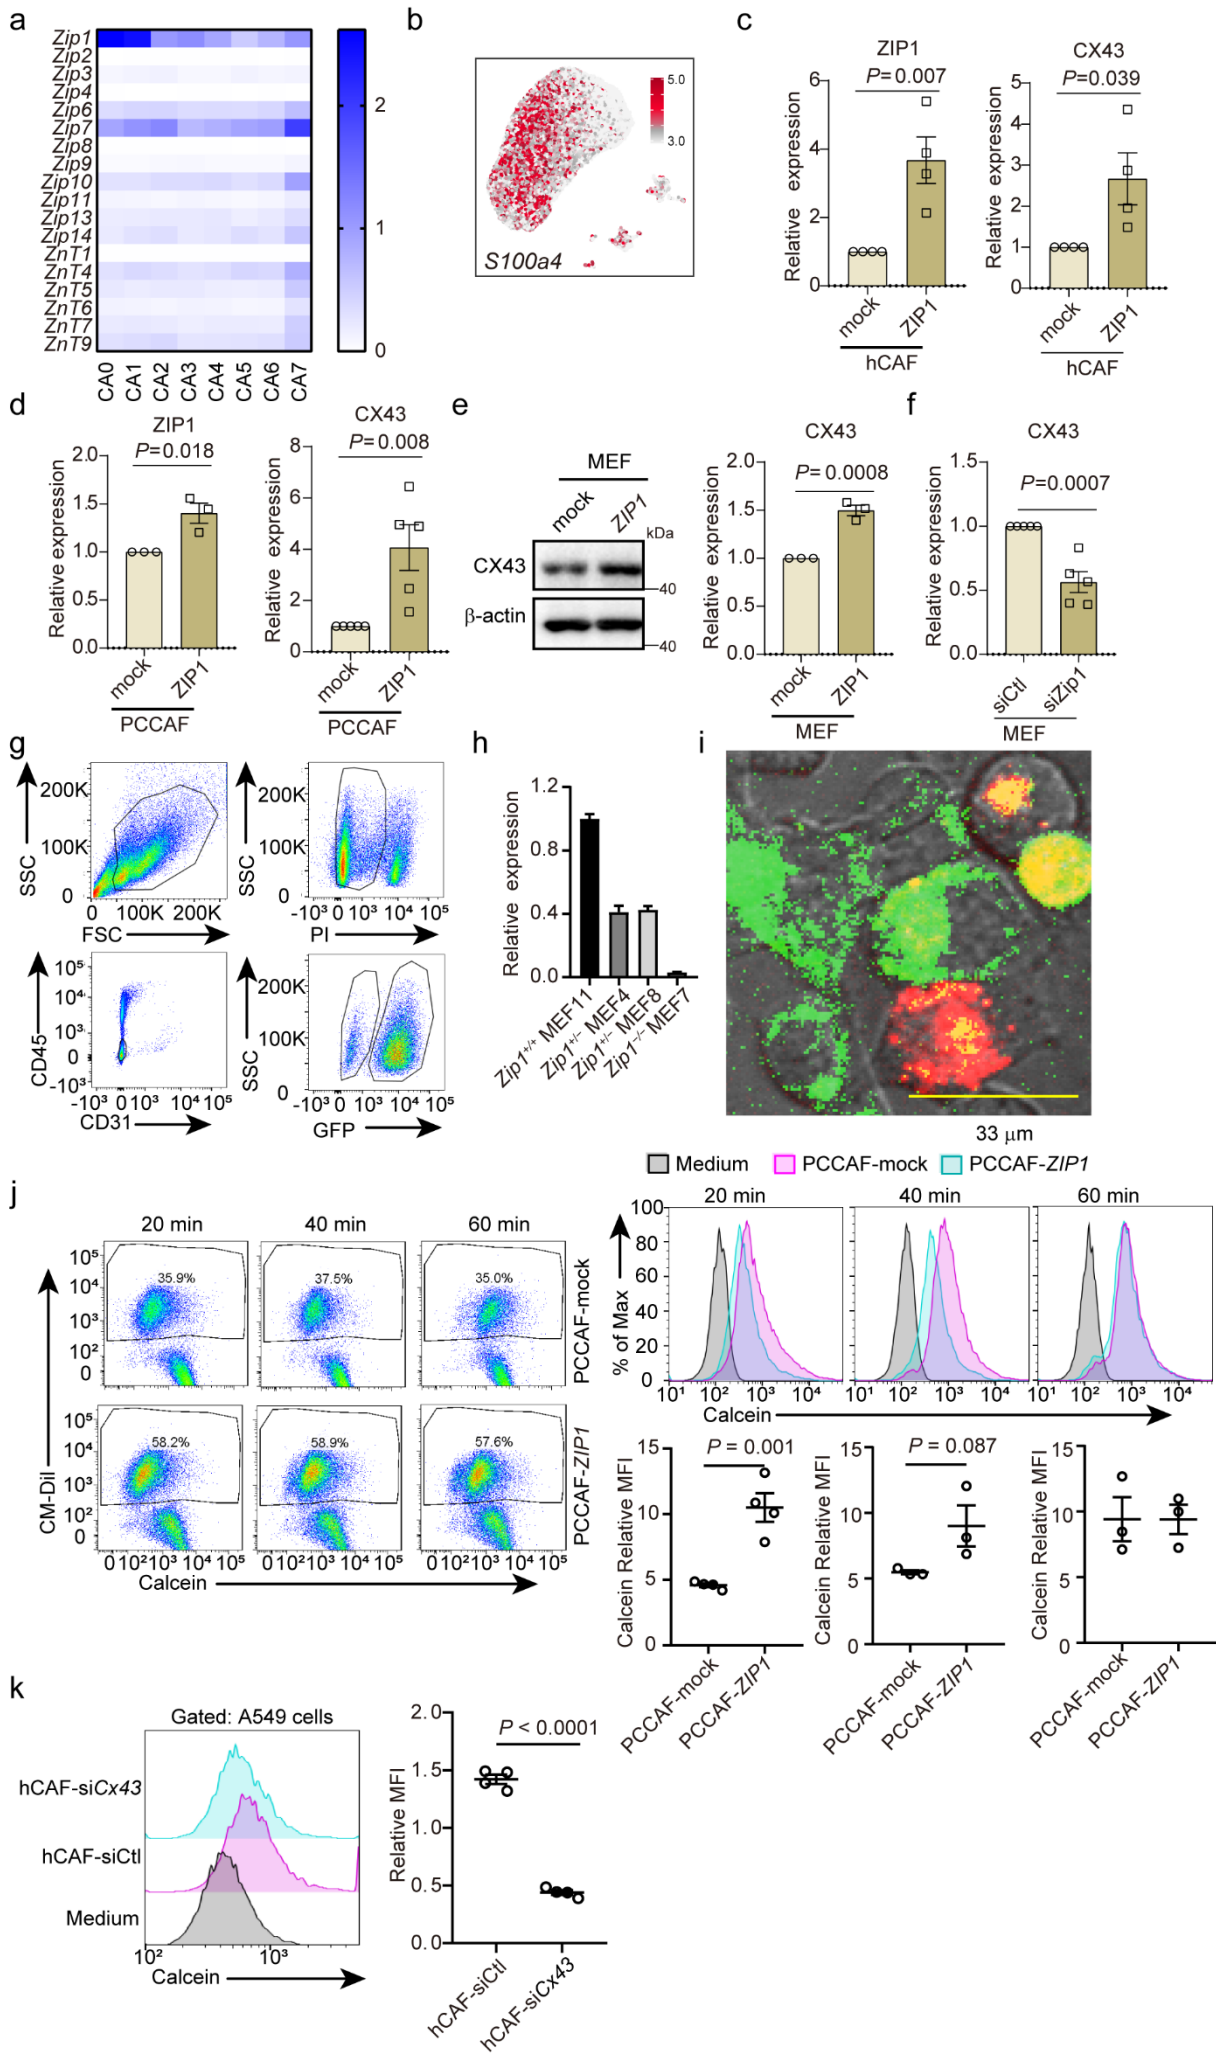

**Supplementary Figure 2. ZIP1<sup>+</sup> fibroblasts interconnect lung cancer cells with gap junctions.** (a) Heatmap showing the expression of zinc transporters by fibroblast subtypes. Single-cell RNA sequencing data derived from mixed three tumour samples for both PBS and DOX group. (b) UMAP plot showing the expression of *S100a4* in cell subsets. Single-cell RNA sequencing data derived from mixed three tumour samples for both PBS and DOX group. (c) Quantification of ZIP1 and CX43 expression detected by Western-blotting in **Fig.2d** from four independent experiments. (d) Quantification of ZIP1 and CX43 expression detected by Western-blotting in **Fig.2e** from three (ZIP1) or five (CX43) independent experiments. (e) Western-blotting determination of expression of CX43 in mouse embryonic fibroblasts (MEFs) transfected with control (mock) or ZIP1-overexpression vector (*ZIP1*). Quantification from three independent experiments is shown. (f) Quantification of ZIP1 and CX43 expression detected by Western-blotting in **Fig.2f** from five independent experiments. (g) Gating strategy for CD45<sup>-</sup>CD31<sup>-</sup>GFP<sup>-</sup> CAFs from LLC-GFP-luc tumor transplanted in *Zip1*<sup>+/+</sup>, *Zip1*<sup>+/-</sup> and *Zip1*<sup>-/-</sup> mice on day 22. n = 3 for *Zip1*<sup>+/+</sup>, n = 5 for *Zip1*<sup>+/-</sup> and *Zip1*<sup>-/-</sup>. (h) Expression of *Zip1* in *Zip1*<sup>+/+</sup>, *Zip1*<sup>+/-</sup> and *Zip1*<sup>-/-</sup> mouse embryonic fibroblasts (MEFs) was determined by qPCR. n = 3 for each group. (i) PCCAF-CX43-GFP and A549-CX43-RFP co-culture showed physical contacts between CX43-GFP and CX43-RFP. A representative result from three independent experiments is shown. (j) Calcein transfer between PCCAFs and A549 tumor cells. A549 cells were labeled with CM-Dil. PCCAF-mock or PCCAF-*ZIP1* were loaded with calcein-AM. Fibroblasts were co-cultured with A549 for different times in DMEM+10%FBS. Medium: A549 alone without fibroblasts used as control. n = 4 for PCCAF-mock, PCCAF-*ZIP1* 20 min, n = 3 for PCCAF-mock, PCCAF-*ZIP1* 40 min, 60 min. (k) Calcein transfer between hCAF-si*Cx43* and A549 tumor cells. Medium: A549 alone. Gating strategy similar to (j) and A549 cells were gated. n = 4 for each group. Unpaired *t*-test for two group comparison. Source data are provided as a Source Data file (a, c-f, h, j-k).

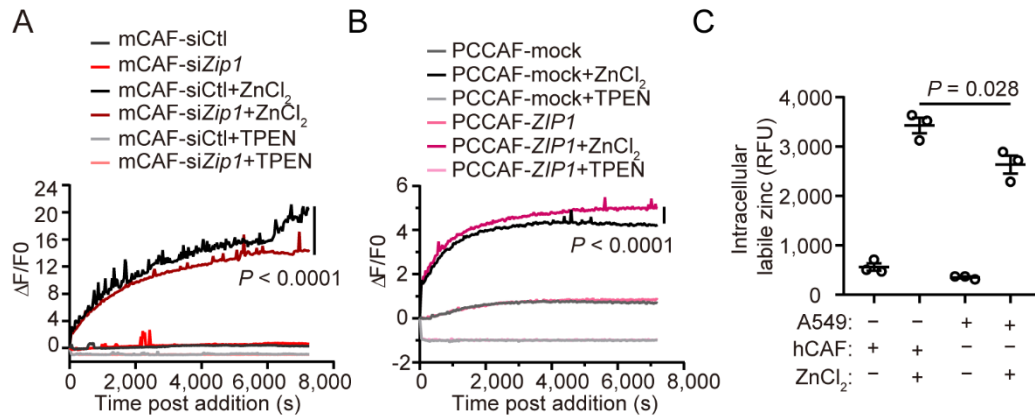

**Supplementary Figure 3. ZIP1 expression promotes Zn<sup>2+</sup> absorption in fibroblasts.** (a) Zn<sup>2+</sup> uptake by mouse cancer-associated fibroblasts (mCAFs) transfected with control (siCtl) or *Zip1*-silencing (si*Zip1*) siRNA, ± ZnCl<sub>2</sub> (30 μM) or TPEN chelator (2 μM) in HBSS. n = 3 for each group. (b) Zn<sup>2+</sup> uptake by prostate-cancer CAFs (PCCAFs) transfected with control (mock) or ZIP1-overexpression vector (*ZIP1*), ± ZnCl<sub>2</sub> or TPEN chelator. n = 3 for each group. (c) Labile Zn<sup>2+</sup> levels in hCAFs and A549 tumor cells with or without addition of ZnCl<sub>2</sub>. A549 or hCAF cells were cultured overnight and loaded with FluoZin3-AM. ZnCl<sub>2</sub> (30 μM) was added in DMEM for 30 min. After changing DMEM to HBSS, the FluoZin3 fluorescence was read. RFU, relative fluorescence units. n = 3 for each group. Unpaired *t*-test for two group comparison. Two-way ANOVA for tumor growth curve comparison. Source data are provided as a Source Data file (a-c).



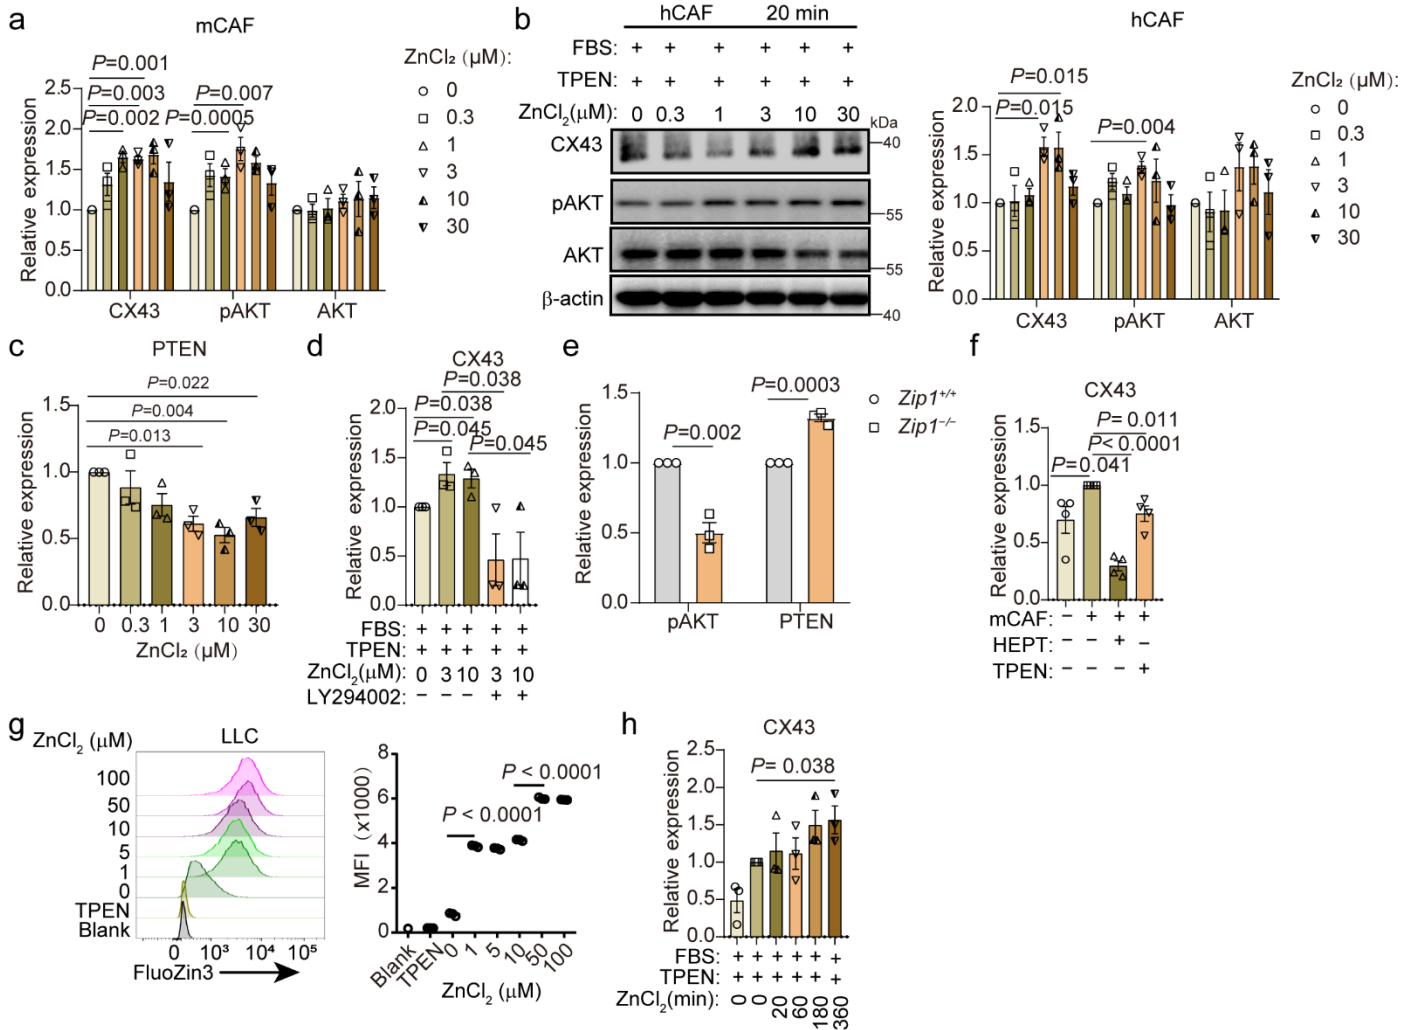

**Supplementary Figure 4. Labile Zn<sup>2+</sup> upregulates CX43.** (a) Quantification of CX43, pAKT and AKT expression detected by Western-blotting in **Fig.4a** from three independent experiments. (b) Labile Zn<sup>2+</sup> in LLC cells after addition of different concentrations of ZnCl<sub>2</sub> in DMEM+10%FBS+5 μM TPEN for 20 min. Quantifications from three independent experiments are shown. LLC cells were pre-loaded with FluoZin3-AM. Blank, no FluoZin3-AM. TPEN, LLC with FluoZin3 were treated with 5 μM TPEN in FACS buffer. (c) Quantification of PTEN expression detected by Western-blotting in **Fig.4b** from three independent experiments. (d) Quantification of CX43 expression detected by Western-blotting in **Fig.4c** from three independent experiments. (e) Quantification of pAKT and PTEN expression detected by Western-blotting in **Fig.4d** from three independent experiments. (f) Quantification of CX43 expression detected by Western-blotting in **Fig.4e** from four independent experiments. (g) Labile Zn<sup>2+</sup> in LLC cells after addition of different concentrations of ZnCl<sub>2</sub> in DMEM+10%FBS+5 μM TPEN for 20 min. LLC cells were pre-loaded with FluoZin3-AM. Blank, no FluoZin3-AM. TPEN, LLC with FluoZin3 were treated with 5 μM TPEN in FACS buffer. n = 3 for each group. (h) Quantification of CX43, pAKT and AKT expression detected by Western-blotting in **Fig.4f** from three independent experiments. Unpaired *t*-test for two group comparison. One-way ANOVA with Tukey's *post hoc* analysis for multigroup comparisons. Source data are provided as a Source Data file (a-h).

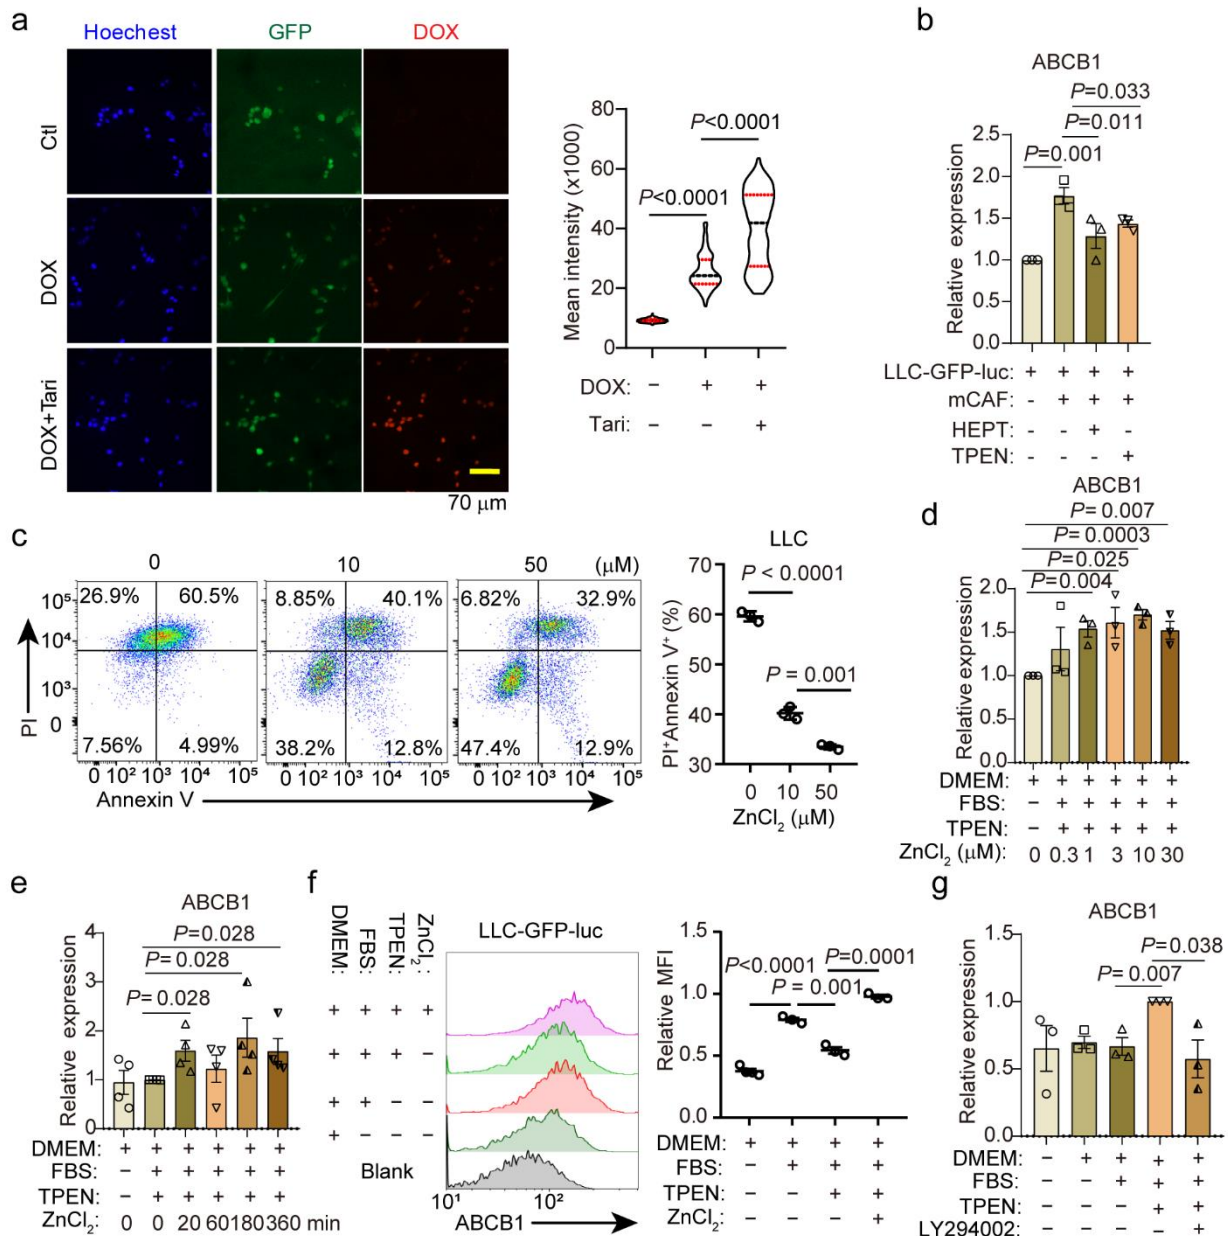

**Supplementary Figure 5. Labile Zn<sup>2+</sup> protects tumor cells from drug toxicity.** (a) DOX accumulation in LLC-GFP-luc cells treated with DOX (3 μM for 4 h) ± ABCB1 inhibitor Tariquidar (Tari, 0.1 μM), analyzed by confocal microscopy. Median ± interquartile range. A representative result from two independent experiments is shown. (b) Quantification of ABCB1 expression detected by Western-blotting in Fig.5c from three independent experiments. (c) DOX-induced apoptosis of LLC-GFP-luc cells with addition of ZnCl<sub>2</sub>. LLC-GFP-luc tumor cells were treated with 3 μM DOX combined with different concentrations of ZnCl<sub>2</sub> for 24 h in DMEM+10%FBS+5 μM TPEN. A representative result from two independent experiments is shown. (d, e) Quantification of ABCB1 expression detected by Western-blotting in Fig.5g, h from three (5g) or four (5h) independent experiments is shown. (f) ABCB1 expression on the cell surface of LLC-GFP-luc tumor cells treated with ZnCl<sub>2</sub> for 4 h determined by FACS. LLC-GFP-luc cells were treated with indicated conditions. TPEN, 5 μM; ZnCl<sub>2</sub>, 30 μM. n = 3 for each group. (g) Quantification of ABCB1 expression detected by Western-blotting in Fig.5k from three independent experiments is shown. Unpaired *t*-test or Mann Whitney test (e) for two group comparison. Source data are provided as a Source Data file (a-g).



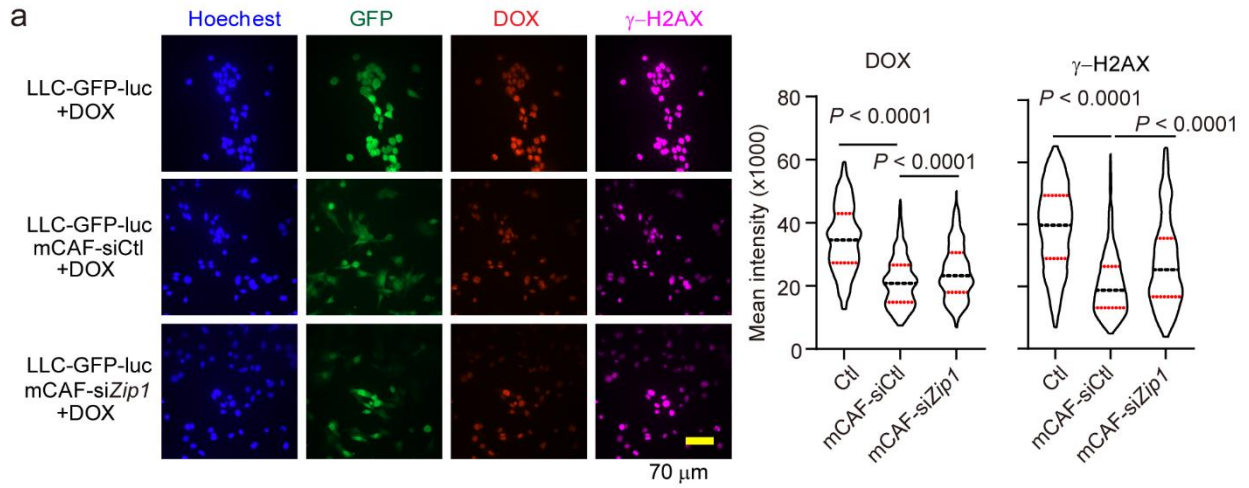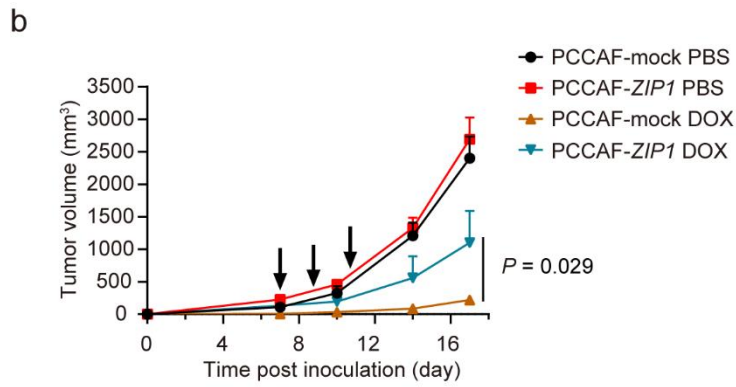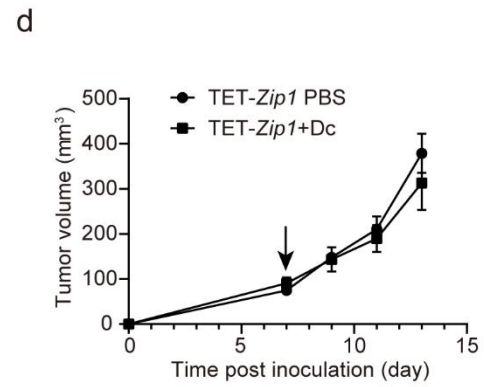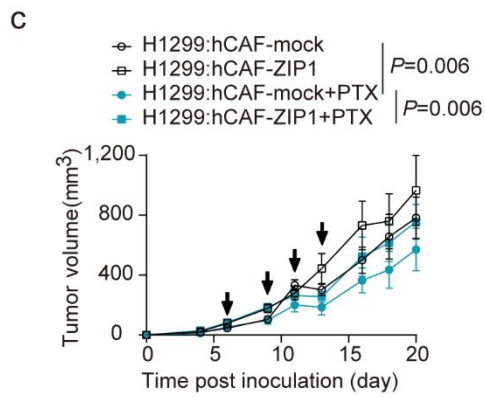

**Supplementary Figure 6. ZIP1<sup>+</sup> fibroblasts promote tumor chemoresistance.** (a) DOX accumulation and DNA damage (indicated by  $\gamma$ -H2AX expression) in LLC-GFP-luc cells co-cultured with siRNA-transfected mCAF-si*Zip1* or mCAF-siCtl in DMEM+10%FBS+5  $\mu$ M TPEN, analyzed by confocal microscopy. DOX (3  $\mu$ M) was added to treat the cells for 4 h, and the cells were stained for GFP and  $\gamma$ -H2AX to identify tumor cells and DNA damage. Median  $\pm$  interquartile range. Unpaired *t*-test for two group comparison. A representative result from two independent experiments is shown. (b) Tumor growth curve of A549 cells co-injected into mice with PCCAF-mock or PCCAF-*ZIP1* cells,  $\pm$  DOX treatment. PCCAF-mock or PCCAF-*ZIP1* ( $9 \times 10^5$ ) cells were co-injected with A549 cells ( $3 \times 10^5$ ) subcutaneously into Balb/c nude mice. When the tumor volume reached  $\sim 100$  mm<sup>3</sup>, tumors were treated with DOX (5 mg/kg) every 2 days, for three treatments. *n* = 4 for PCCAF-mock group, *n* = 5 for other groups. (c) Tumor growth curve of H1299 cells co-injected with hCAF-mock or hCAF-*ZIP1* cells into NOD-SCID mice,  $\pm$  PTX treatment. hCAF-mock or hCAF-*ZIP1* ( $1 \times 10^6$ ) cells were co-injected with H1299 cells ( $5 \times 10^5$ ) subcutaneously into NOD-SCID mice. When the tumor volume reached  $\sim 100$  mm<sup>3</sup>, tumors were treated with PTX (10 mg/kg) on indicated day for four times. *n* = 8 for vehicle groups, *n* = 7 for PTX groups. (d) Tumor growth curves for mice inoculated with LLC cells and mCAFs with tetracycline (Tet)-off system-controlled expression of *Zip1* (TET-*Zip1*). Arrow, doxycycline (Dc) or PBS drinking. TET-*Zip1*, co-transfected with pTet-off and pTRE2-m*Zip1*. *n* = 5 for PBS group, *n* = 6 for Dc group. Two-way ANOVA for tumor growth curve comparison. Source data are provided as a Source Data file (a-d).

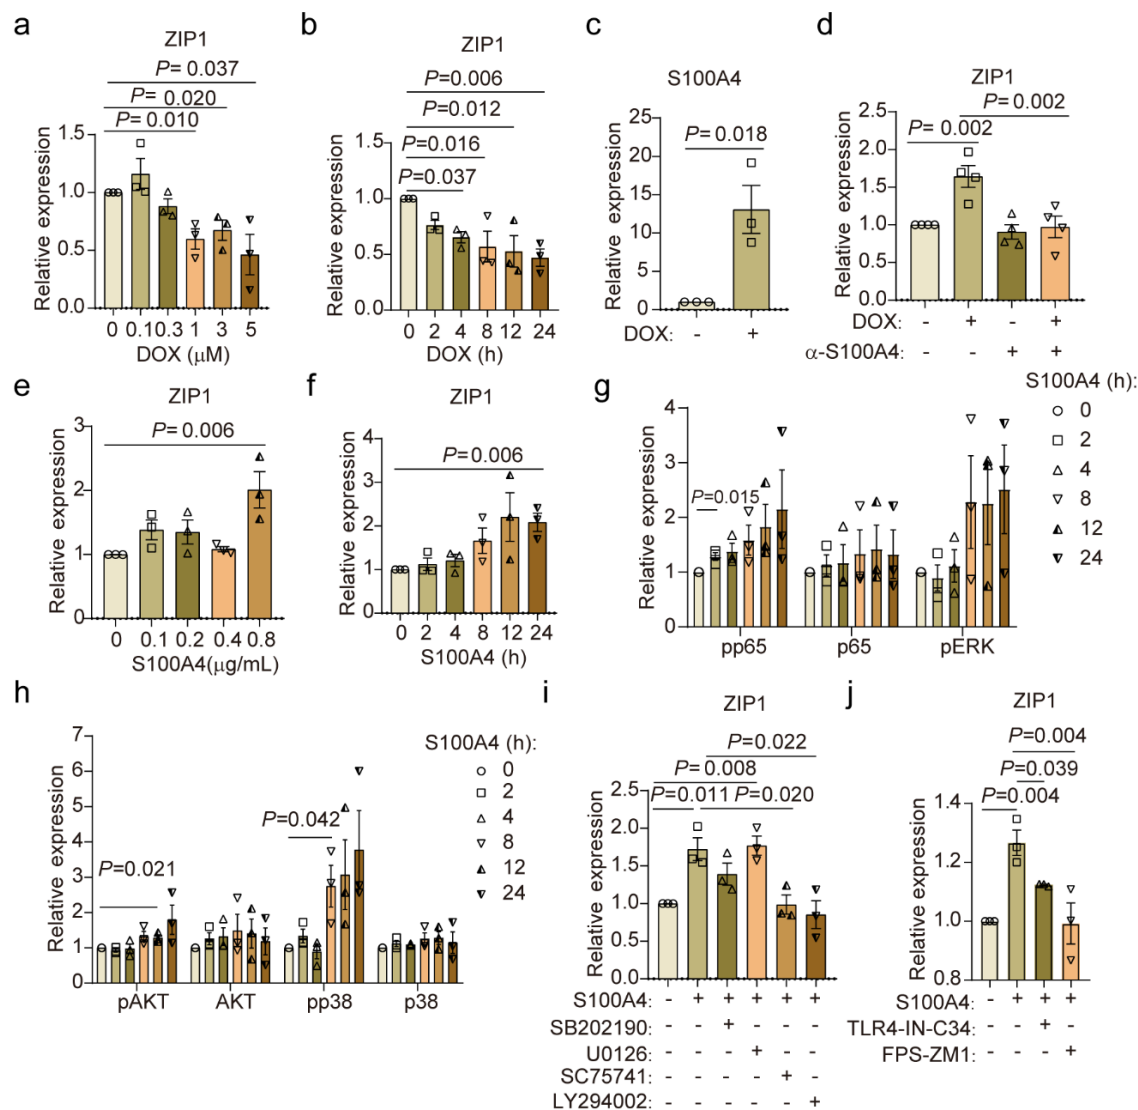

**Supplementary Figure 7. S100A4 increases ZIP1 expression in fibroblasts.** (a, b) Quantification of ZIP1 expression detected by Western-blotting in Fig.7a, b from three (7a, b) independent experiments is shown. (c) Quantification of S100A4 expression detected by Western-blotting in Fig.7c from three independent experiments is shown. CM without DOX treatment was used as controls. (d) Quantification of ZIP1 expression detected by Western-blotting in Fig.7d from four independent experiments is shown. (e, f) Quantification of ZIP1 expression detected by Western-blotting in Fig.7e, f from three (7e, f) independent experiments is shown. (g) Quantification of pp65, p65 and pERK expression detected by Western-blotting in Fig.7g from three independent experiments is shown. (h) Quantification of pAKT, AKT, pp38 and p38 expression detected by Western-blotting in Fig.7h from three independent experiments is shown. (i, j) Quantification of ZIP1 expression detected by Western-blotting in Fig.7i, j from three (7i, j) independent experiments is shown. Unpaired *t*-test for two group comparison. Source data are provided as a Source Data file (a-j).

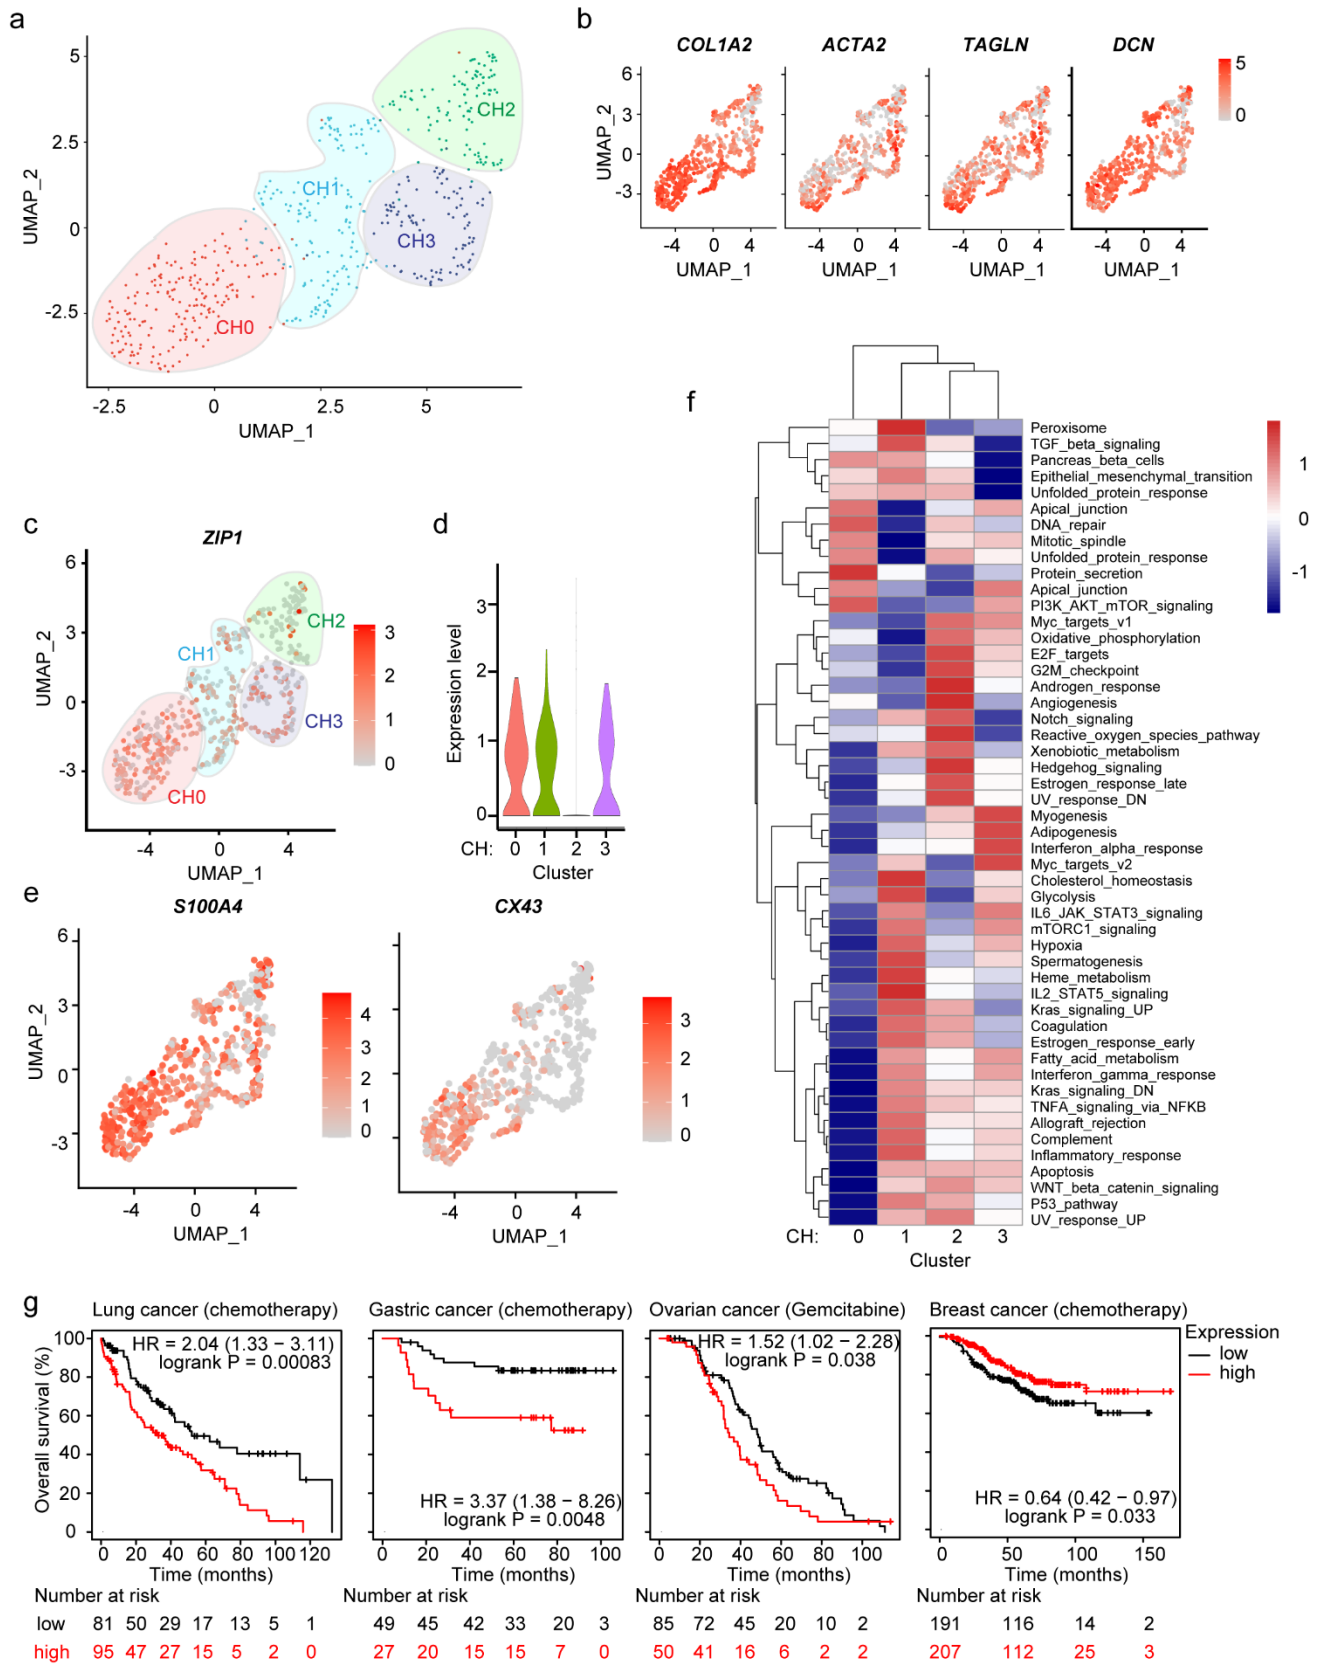

**Supplementary Figure 8. Analysis of scRNAseq datasets of human lung adenocarcinoma identifies ZIP1<sup>+</sup>S100A4<sup>+</sup>CX43<sup>high</sup> fibroblasts.** (a) scRNAseq datasets of eight human primary lung adenocarcinomas (GEO: GSE123904) were analyzed and CAF cells were re-clustered. UMAP plot displaying 554 fibroblast cells classified into four subsets. (b) UMAP plots showing the expression of common fibroblast marker genes (*COL1A2*, *ACTA2*, *TAGLN*, *DCN*). (c, d) UMAP plot (c) and violin plot (d) showing the expression of *ZIP1* in fibroblast clusters. (e) UMAP plots showing the expression of *S100A4* and *CX43*. (f) Heatmap of gene-set variation analysis of hallmark signaling pathway terms in the four fibroblast subsets. (g) The association of the expression level of three genes (*ZIP1*, *S100A4*, *CX43*) with overall survival rate of lung, gastric, ovarian and breast cancer patients after chemotherapy. Data are derived from Kaplan-Meier plotter ([kmplot.com/analysis](http://kmplot.com/analysis)). Log-rank test for survival curve comparison. Source data are provided as a Source Data file (d, g).



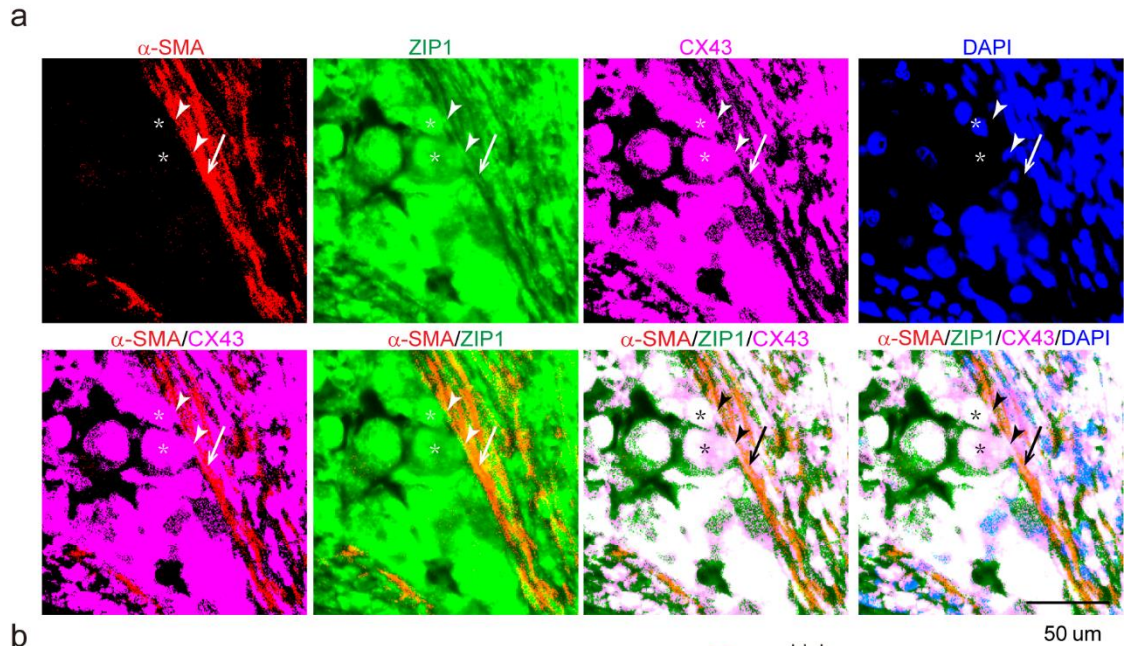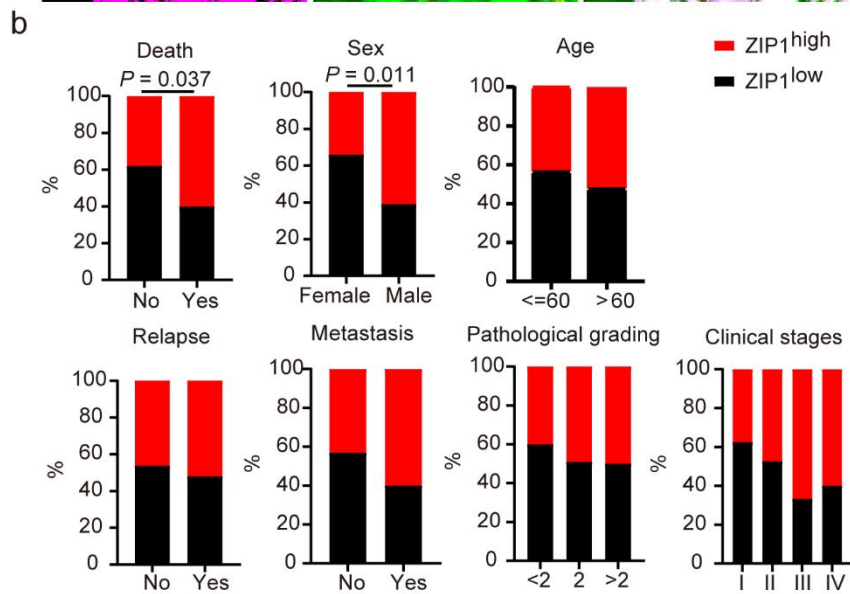

**Supplementary Figure 9. ZIP1<sup>+</sup> fibroblasts interconnect cancer cells in human lung adenocarcinoma.**

(a) Representative results showing gap junctions between ZIP1<sup>+</sup> fibroblasts and cancer cells in human lung adenocarcinoma from two independent experiments are shown. Tumor sections were stained with  $\alpha$ -SMA, ZIP1, CX43 and DAPI. Arrowhead, gap junction. Asterisk, cancer cell. Arrow, ZIP1<sup>+</sup> fibroblasts. (b) Relationships of ZIP1<sup>high</sup> and ZIP1<sup>low</sup> fibroblast status with different clinical parameters. 90 patients were analysed. The differences were analyzed by  $\chi^2$  tests. Source data are provided as a Source Data file (b).

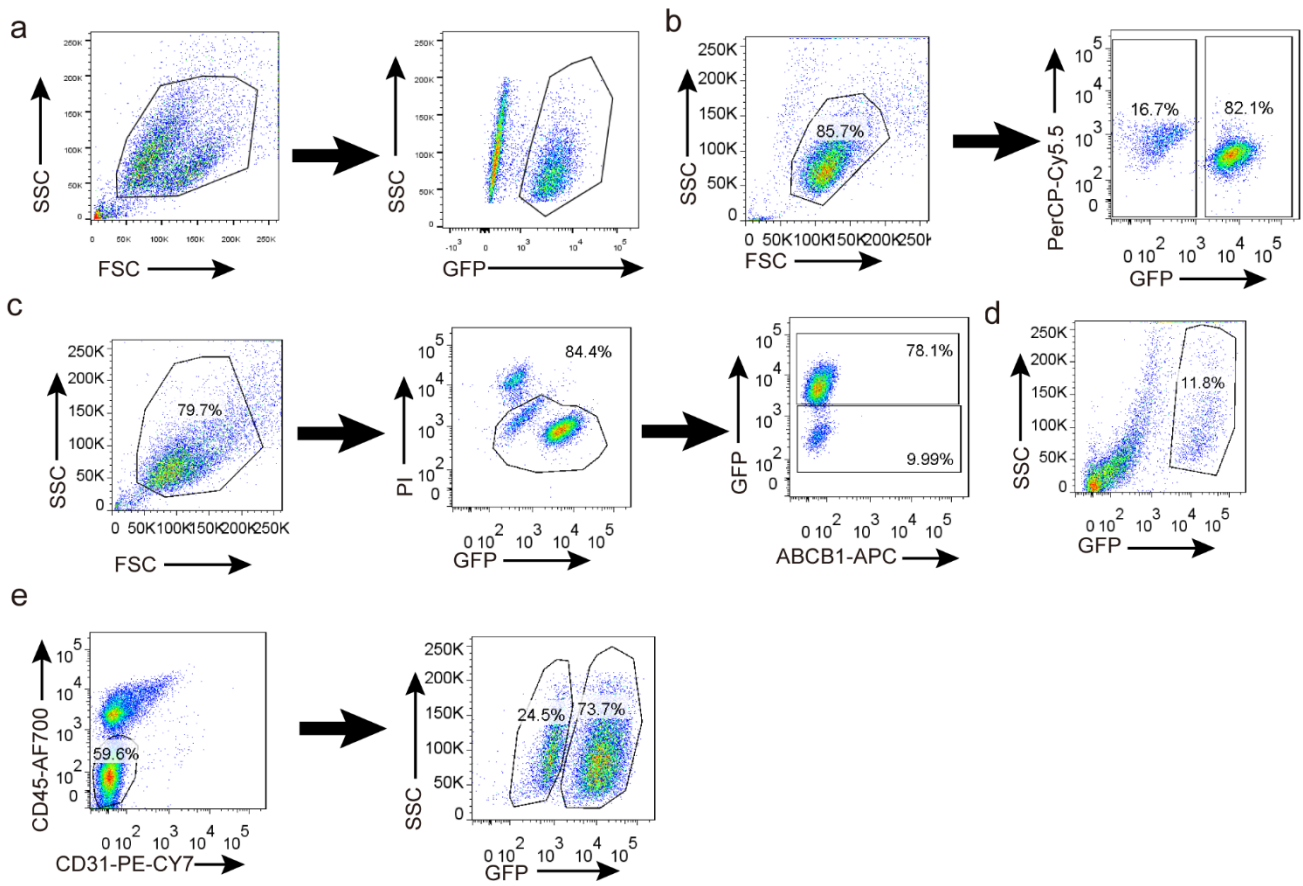

**Supplementary Figure 10. FACS gating strategies.** Panels (a-e) correspond to FACS data panels in Figure 6a-e, respectively.

**Supplementary Table 1. Cluster characteristics.** Clusters, the cell number in individual cluster, the cell number in different samples, the average number of detected genes in individual cluster, the average number of UMIs in individual cluster.

| Cluster | Cells | PBS  | DOX  | Genes (Mean) | UMI (Mean) | Marker Genes                                                                                                                                                                                                                                                                                                                                                                                                                                                                                                                                                                                                                                                                                                                                                                                                                                                                                                                                                                                                                                                                        |
|---------|-------|------|------|--------------|------------|-------------------------------------------------------------------------------------------------------------------------------------------------------------------------------------------------------------------------------------------------------------------------------------------------------------------------------------------------------------------------------------------------------------------------------------------------------------------------------------------------------------------------------------------------------------------------------------------------------------------------------------------------------------------------------------------------------------------------------------------------------------------------------------------------------------------------------------------------------------------------------------------------------------------------------------------------------------------------------------------------------------------------------------------------------------------------------------|
| 0       | 7681  | 1915 | 5766 | 2597         | 10595      | <i>Actb,Abhd2,Notch2,Slc39a1</i>                                                                                                                                                                                                                                                                                                                                                                                                                                                                                                                                                                                                                                                                                                                                                                                                                                                                                                                                                                                                                                                    |
| 1       | 4154  | 2447 | 1707 | 3713         | 21299      | NA                                                                                                                                                                                                                                                                                                                                                                                                                                                                                                                                                                                                                                                                                                                                                                                                                                                                                                                                                                                                                                                                                  |
| 2       | 3779  | 2244 | 1535 | 3454         | 16679      | <i>Col3a1,Malat1,Dcn,Fn1,Neat1,Dpt,Prg4,Wls,Fstl1,Dkk2,Matn2,Sat1,Nupr1,Gadd45a,Jund,Nav1,Ghr,Thbs2,Ill33,Angptl7,Nnmt,Dock10,Lrp1,Hk2,Osr2,Aspn,Vcan,Cebpd,Igfbp4,Sox4,Man1a</i>                                                                                                                                                                                                                                                                                                                                                                                                                                                                                                                                                                                                                                                                                                                                                                                                                                                                                                   |
| 3       | 3082  | 1819 | 1263 | 4111         | 25167      | <i>Hmgb2,H2afz,Birc5,Tuba1b,Pimreg,Cenpf,Cenpa,Cdca3,Racgap1,Cdca8,Hmgb1,Ccna2,Cks2,Ccnb1,Top2a,Smc4,Stmn1,Tpx2,Cks1b,Ccnb2,Cdc20,Pclaf,Cdk1,Tk1,Pbk,Ube2c,Smc2,Seleenoh,Kifc1,Nusap1,Cenpq,Kif22,Hmgn2,Mki67,Kif2c,H2afx,Mad211,Shcbp1,Cenpe,Tubb6,Ndc80,Aurkb,Ran,Hmgb3,Asf1b,Cenpw,Lockd,Lsm2,Kif23,Incenp,Spc24,Prc1,Anp32e,Pmf1,Tubb4b,Hmmr,Kif20a,Ube2s,Trip13,Ckap2,Nucks1,Rrm1,Gmnn,Plk4,Hmgn1,Sgo1,Knstrn,Kif20b,Usp1,Pttg1,Lmnbl,Tubb5,Cenph,Lig1,Msln,Kn1,Phgdh,Lyar,Spc25,Tcof1,Mis18bp1,Ddx39,Nrm,Plk1,Dnph1,Psat1,Reep4,Ranbp1,Bok,Srsf7,Tuba1c,Calm1</i>                                                                                                                                                                                                                                                                                                                                                                                                                                                                                                             |
| 4       | 394   | 300  | 94   | 2409         | 9558       | <i>Srgn,C1qb,Fcer1g,Ctss,Tyrobp,Cd52,Ecm1,Arg1,Lyz2,C1qc,C1qa,Ms4a8a,Pf4,Saa3,Cxcl2,Ltc4s,Ccl6,Wfdc17,Laptm5,Mrc1,Csf2rb,Alox5ap,Fxyd5,Sh3bgrl3,Wfdc21,Cotl1,Apoe,Fcna,F13a1,Coro1a,Ucp2,C5ar1,Ms4a7,Ccl9,Cd33,Mafk,P2ry6,S100a8,Rac2,Fcgr2b,Fcgr3,Clec4d,Psmb8,Lgmn,Bcl2a1b,Spi1,Ms4a6c,Smpdl3a,AA467197,Slfm2,Cd68,Cxcl3,Cxcl16,Itgam,Lcp1,Cd300lf,Cjp,Ncf4,Rgs1,Tgfbp1,Ptpn18,Pmepa1,Itgb2,Ctsh</i>                                                                                                                                                                                                                                                                                                                                                                                                                                                                                                                                                                                                                                                                              |
| 5       | 390   | 127  | 263  | 2863         | 10952      | <i>Tmem252,Plvap,Ctla2a,Igfbp3,Gpibp1,Lrg1,Aqp1,Cldn5,8430408G22Rik,Flt1,Egfl7,Cdh5,H2-K1,Ly6a,Ecscr,Pecam1,Pdlim1,Ly6c1,Trp53i11,Gda,Adgrf5,Scarb1,Cd93,Mmrn2,Csrp2,Rtl8a,Cd34,Nfkbia,Upp1,Cd300lg,Rbp1,S1pr1,Ptprb,Jam2,Tnfrsf9,Tspan13,Ldb2,Cd36,Prs23,Rasip1,Tspan15,Mfng,Adgrg1,Rnd1,Tgm2,Car4,Prex2,Tm4sf1,Grrp1,Vwv,Cyyr1</i>                                                                                                                                                                                                                                                                                                                                                                                                                                                                                                                                                                                                                                                                                                                                                |
| 6       | 73    | 69   | 4    | 2951         | 10773      | <i>Meg3,Rgs5,Gja4,Cyp4b1,Sparcl1,Ednrb,Sparc,Gm12840,Igfbp7,Nr4a1,Hspb1,Timp3,Rasl1Ia,Gm13889,Steap4,Rgs2,Ndufa4l2,Col5a2,Cryab,Rarres2,Cd302,Gimap6,Adams4,Lama2,Rasd1,Hrct1,Esam,Loxl1,Cdc42ep3,Fabp4,Col4a1,Inhbb,Spon1,Gpx7,Pdgfrb,I16,Ramp1,Thbs1,Col4a2,Emid1,Cd53,Jaml,Slc12a2,Gadd45b,Pid1,Acer2,Sult1a1,Olfml2b,Pde4b,Emcn,F11r,Angpt2,Apod,C1ca3a1,Hspa1a,Adams9,Pdgfrl,Tnfaip3,Ebf1,Fam43a,Slfm5,Cd200,Uchl1,Gpx3,Tnfaip6,Postn,Angptl4,Cd248,Plpp3,Ndn,Slc11a1,Pmp22,Serping1,Des,Smagp,Serpine2,Selenbp1,Btg2,Mustn1,Iigp1,Iiga1,Ass1,Tinag11,Bgn,Col6a3,Adams1,Pik3r1,App,Cystm1,Gngt2,Kcnj8,Lysmd2,Atf3,Selenop,Crip2,Isig15,Anxa6,Tnfrsf23,Cdkn1a,Cygb,Zfp3611,Gm42418,Crip1,Tmsb4x,Nr4a2,Ece1,Pla1a,Gpm6b,Id3,Bcam,Pycard,P4ha2,Egr1,Junb,Gas1,Arhgdib,Gng11,Hacd2,Sept4,Gadd45g,Id1,Hes1,Cfh,Enah,Metrn,Tmem176b,Hilpda,Ppp1r14a,Fosb,Plin2,Tsc22d1,Plat,Cp,Apold1,Jun,H2-D1,Fos,Pdgfa,Marcks,Dnajb1,Tacc3,Denn5b,mt-Nd1,Dusp1,Rasgrp2,Trib1,Spry2,Cpe,Acta2,Mcam,Lgals9,Tmem176a,Ifitm1,Loxl2,Rhob,Ddit4,Dusp2,mt-Cytb,Mndal,Rgs16,Myl9,mt-Co2,Phlda1,Exosc8</i> |
| 7       | 64    | 43   | 21   | 2764         | 10659      | <i>Col1a1,Rnase4,Ctsk,Mmp2,Col1a2,Nbl1,Htra3,Serpina3n,Mfap5,Hsd11b1,Fbln2,Timp1,Cilp,Wisp2,Tnfrsf26,Sema3c,Ill1ra1,Plac8,Crispld2,S100a16,Fbn1,Lrrn4cl,Tmem119,Rora,Lsp1,Pdpr,Fam46a,Gas7a,Col6a2,Olfml3,Klf4</i>                                                                                                                                                                                                                                                                                                                                                                                                                                                                                                                                                                                                                                                                                                                                                                                                                                                                  |

**Supplementary Table 2. The top ranked 100 genes for each gene expression programs (GEPs) based on the gene\_spectra\_score of cNMF.**

| GEP  | Top ranked 100 genes                                                                                                                                                                                                                                                                                                                                                                                                                                                                                                                                                                                                                                                                                                                                     |
|------|----------------------------------------------------------------------------------------------------------------------------------------------------------------------------------------------------------------------------------------------------------------------------------------------------------------------------------------------------------------------------------------------------------------------------------------------------------------------------------------------------------------------------------------------------------------------------------------------------------------------------------------------------------------------------------------------------------------------------------------------------------|
| GEP1 | <p><i>Mt2, Fth1, Notch2, Mt1, Pam, Tsc22d3, Cirbp, Spry2, Sdc4, Actb, Abhd2, Anxa1, Ftl1, Cp, Eef2, Nfia, Slc39a1, Fkbp5, Hsp90ab1, Aplp2, Prune2, Gpnm, Ubb, Cbx3, Rpl10, Dusp1, Txnip, Rps26, Rps4x, Sgk1, Cxcl1, Gnb1, Tpt1, Rplp0, Preb, Prdx6, Angptl7, Wtap, Ezr, Klf9, Insig1, Eef1a1, Fos, Lgals3, Kdm6b, Rps27a, Rpl12, Rps24, Hes1, Ddx5, Srrm2, Rps12, Pan3, Rps8, Rpl21, Sqstm1, Rpl29, Rps9, Rpl18a, Lrrc8a, Pfdn5, Rps20, Rpl32, Alkbh5, S100a4, Psap, Pabpc1, Kdelr2, Rpl4, Pdcd4, Rhoa, Eif4ebp1, Rps27, Fhl3, Cdkn1b, Rps25, Rps3a1, Rps29, Rps10, Sept10, Rplp1, Junb, Gsk3b, Anxa2, Rpl17, Cox7a2l, S100a11, Rpl36a, Rpl30, Klf13, Klf2, Fau, Sik1, Rpl36, Rps14, Eif4a1, Rps23, Socs3, Itm2b, Rps7</i></p>                           |
| GEP2 | <p><i>Gchfr, Mif, AY036118, Ldha, Hspe1, Bst2, Ung, Tpm1, Dctpp1, Fam162a, Bsg, Uqcc2, Gm42418, Aldoa, Gm13889, Rrm2b, Fdps, Pfk1, Sqle, Ppid, Gm29666, Cox8a, Cisd3, Ppil1, Prss22, Ndufb2, Slc2a1, AC160336.1, Wdcp, Cycs, Hbegf, Fxyd5, Idi1, Hells, Pgk1, Uchl3, Areg, Serf2, Pthlh, Ifitm3, Aldh1a3, Uqcrq, Higd1a, Acat2, Sdf2l1, Edf1, Cnn2, Rpl13a, Cox17, Cyp51, Ydjc, Gamt, B2m, Fgf3p3, Nop10, Ndufv3, Nptx1, Nme1, Ly6c1, Tma7, Ndufa13, Ankrd37, Txnl4a, Fasn, Olfr889, Egl7, Mrps6, Gstt1, Sigmar1, Tpi1, Nudt5, Scd2, Myd88, Pgam1, Ccne2, Uqcr11, Pmvk, Naa38, Cisd1, Ero1l, Cyb5b, Coa3, Tfrc, Pbl1, Sms, Tmem80, Tomm5, Gale, Snrpe, Mrpl14, Plec, Odc1, Gch1, Mgst3, 2010107E04Rik, Ccne1, Mcrip2, 2900009J06Rik, Dbi, Fam96b</i></p> |
| GEP3 | <p><i>Dcn, Lum, Dpt, Col3a1, Fn1, Fbn1, Bgn, Gng11, Col6a3, Mfap4, Mmp3, Asp, Dkk2, Sparc, Fap, Vcan, Sat1, Ghr, Nupr1, Mmp12, Prg4, Ccl7, Cfh, Thbs2, Enpp2, Anxa6, Fstl1, Adamts1, Nnmt, Ebf1, Zbp1, S100a16, Nfkbiz, Sdc2, Maged2, Ier2, Phlda1, Hk2, Gpr153, Il33, Igfbp4, Ccl8, Ccl11, Egr1, Tnc, Cpq, Neat1, Vegfd, Wls, Plod2, Man1a, Copz2, Prrx1, Rgma, Lsp1, Cdon, Gadd45a, Lrp1, Col4a5, Ptn, Zbtb20, Col1a1, Nav1, Nr2f1, Itm2b, Nrp1, P3h4, Inhba, Lrrc17, AC149090.1, Lpar1, Wisp1, Ptgfrn, Ass1, Fkbp10, Gpm6b, Antxr1, Trp53i11, Hist1h1c, Mmp14, Osr2, Matn2, Tmed3, Pros1, Snhg18, Ifi207, Jund, Scarb2, Cilp, Medag, Kdelr3, Fcgrt, Mxra8, Malat1, Hexa, B3gnt9, Selenom, Ifi27, Klf6, Rgmb</i></p>                                   |
| GEP4 | <p><i>Birc5, Ube2c, Hmgb2, Ccnb1, Ccna2, Cdca8, Pimreg, Cenpf, Cdc20, Cdca3, Cenpa, Tpx2, Prc1, Top2a, Nusap1, Cenpe, Plk1, Mki67, Aurka, Hmnr, Racgap1, Cdk1, Kif23, Cks2, Aurkb, Smc4, Smc2, Kif22, Ccnb2, Tacc3, Pclaf, Stmn1, Sgo1, Spe25, Kifc1, H2afx, Knl1, Kif20b, Kif20a, Mis18bp1, Kif2c, Ckap2l, Ndc80, H2afz, Pbk, Tuba1b, Knstrn, Incenp, Sapcd2, Spc24, Asf1b, Mad2l1, Cenpq, Sgo2a, Lockd, Shcbp1, Cks1b, Cdkn3, Tubb4b, Ska1, Tk1, Cep55, Cenpw, Aspm, Nek2, Ckap2, Dlgap5, Anln, Hmgn2, Cit, Bub1, Ncapg, Mxd3, Depdc1a, Kif11, Cdca2, Cdc25c, Pttg1, Hmgb3, Troap, Hmgb1, Bub1b, Nuf2, Ect2, Tubb6, Pmf1, Selenoh, Cdca5, Ube2s, Kpna2, Ccnf, Trip13, Gas2l3, Dbf4, Lsm2, Melk, Ncapd2, Lmn1, Kif4, Kif15</i></p>                      |

**Supplementary Table 3. Selected genes upregulated in the transition from Cluster 0 to Cluster 2 and within Cluster 0.**

| <b>Cluster transition</b> | <b>Upregulated genes</b>                                      |
|---------------------------|---------------------------------------------------------------|
| Cluster 0 to Cluster 2    | <i>Wls, Nnmt, Plod2, Vcan, Col3a1, Ebf1, Fstl1, Sdc2, Dcn</i> |
| Cluster 0 to Cluster 0    | <i>Spry2, Cxcl1, Alkbh5, Mt2, Mt1, Nfia</i>                   |



**Supplementary Table 4. Patient information of 30 lung adenocarcinoma cases.**

| <b>Patient ID</b> | <b>Histology</b> | <b>Pathological stage</b> | <b>Biopsy Site</b> |
|-------------------|------------------|---------------------------|--------------------|
| E05A3080          | Adenocarcinoma   | I - II                    | Lung               |
| E05A3302          | Adenocarcinoma   | I - II                    | Lung               |
| E05A3459          | Adenocarcinoma   | I - II                    | Lung               |
| E05A3072          | Adenocarcinoma   | II                        | Lung               |
| E05A3081          | Adenocarcinoma   | II                        | Lung               |
| E05A3086          | Adenocarcinoma   | II                        | Lung               |
| E05A3095          | Adenocarcinoma   | II                        | Lung               |
| E05A3305          | Adenocarcinoma   | II                        | Lung               |
| E05A3315          | Adenocarcinoma   | II                        | Lung               |
| E05A3362          | Adenocarcinoma   | II                        | Lung               |
| E05A3374          | Adenocarcinoma   | II                        | Lung               |
| E05A3416          | Adenocarcinoma   | II                        | Lung               |
| E05A3478          | Adenocarcinoma   | II                        | Lung               |
| E05A3723          | Adenocarcinoma   | II                        | Lung               |
| E05A3093          | Adenocarcinoma   | II -III                   | Lung               |
| E05A3111          | Adenocarcinoma   | II -III                   | Lung               |
| E05A3234          | Adenocarcinoma   | II -III                   | Lung               |
| E05A3238          | Adenocarcinoma   | II -III                   | Lung               |
| E05A3247          | Adenocarcinoma   | II -III                   | Lung               |
| E05A3264          | Adenocarcinoma   | II -III                   | Lung               |
| E05A3327          | Adenocarcinoma   | II -III                   | Lung               |
| E05A3363          | Adenocarcinoma   | II -III                   | Lung               |
| E05A3369          | Adenocarcinoma   | II -III                   | Lung               |
| E05A3370          | Adenocarcinoma   | II -III                   | Lung               |
| E05A3424          | Adenocarcinoma   | II -III                   | Lung               |
| E05A3804          | Adenocarcinoma   | II -III                   | Lung               |
| E05A4547          | Adenocarcinoma   | II -III                   | Lung               |
| E05A3101          | Adenocarcinoma   | III                       | Lung               |
| E05A3300          | Adenocarcinoma   | III                       | Lung               |
| E05A3301          | Adenocarcinoma   | III                       | Lung               |
