# Supplementary material for: ZIP1+ fibroblasts protect lung cancer against chemotherapy via connexin-43 mediated intercellular Zn2+ transfer
Source: PubMed Central journal article supplement (PMC9547061; doi:10.1038/s41467-022-33521-4), 2022-10-07
Supplement: 41467_2022_33521_MOESM9_ESM.pdf [file 41467_2022_33521_MOESM9_ESM.pdf]

To view the full contents of this document, you need a later version of the PDF viewer. You can upgrade to the latest version of Adobe Reader from [www.adobe.com/products/acrobat/readstep2.html](http://www.adobe.com/products/acrobat/readstep2.html)

For further support, go to [www.adobe.com/support/products/acrreader.html](http://www.adobe.com/support/products/acrreader.html)
